# Supplementary material for: Diagnostic accuracy of magnetic resonance enterography and small bowel ultrasound for the extent and activity of newly diagnosed and relapsed Crohn's disease (METRIC): a multicentre trial
Source: PubMed Central journal article supplement (PMC6278907; doi:10.1016/s2468-1253(18)30161-4), 2018-06-18
Supplement: mmc1.pdf [file mmc1.pdf]

# THE LANCET

## Gastroenterology & Hepatology

### Supplementary appendix

This appendix formed part of the original submission and has been peer reviewed. We post it as supplied by the authors.

Supplement to: Taylor S A, Mallett S, Bhatnagar G, et al. Diagnostic accuracy of magnetic resonance enterography and small bowel ultrasound for the extent and activity of newly diagnosed and relapsed Crohn's disease (METRIC): a multicentre trial. *Lancet Gastroenterol Hepatol* 2018; published online June 15. [http://dx.doi.org/10.1016/S2468-1253\(18\)30161-4](http://dx.doi.org/10.1016/S2468-1253(18)30161-4).

## Web Appendix

**Table 1. Recruitment sites and recruitment totals**

| Recruitment site                                                           | Principle Investigator  | Total patients screened | Total patients recruited (new diagnosis) [n (% of total)] | Total patients recruited (suspected relapse) [n (% of total)] | Total patients recruited (both patient cohorts) [n (% of total)] | Total patients withdrawn [n (% of total)] | Total patients in final cohort (new diagnosis) [n (% of total)] | Total patients in final cohort (suspected relapse) [n (% of total)] | Total patients in final cohort (both cohorts) [n (% of total)] |
|----------------------------------------------------------------------------|-------------------------|-------------------------|-----------------------------------------------------------|---------------------------------------------------------------|------------------------------------------------------------------|-------------------------------------------|-----------------------------------------------------------------|---------------------------------------------------------------------|----------------------------------------------------------------|
| University College London Hospital                                         | Professor Stuart Taylor | 177                     | 66 (39)                                                   | 69 (41)                                                       | 135 (40)                                                         | 19 (36)                                   | 52 (39)                                                         | 64 (42)                                                             | 116 (41)                                                       |
| Queen Alexandra Hospital, Portsmouth                                       | Dr Tony Higginson       | 66                      | 32 (19)                                                   | 27 (16)                                                       | 59 (18)                                                          | 9 (18)                                    | 28 (20)                                                         | 22 (15)                                                             | 50 (18)                                                        |
| St James's University Hospital, Leeds Teaching Hospitals, NHS Trust, Leeds | Dr Damian Tolan         | 69                      | 29 (17)                                                   | 22 (13)                                                       | 51 (15)                                                          | 4 (8)                                     | 27 (20)                                                         | 20 (13)                                                             | 47 (17)                                                        |
| Ninewells Hospital, Dundee                                                 | Dr Ian Zealley          | 71                      | 11 (6)                                                    | 15 (9)                                                        | 26 (8)                                                           | 3 (6)                                     | 9 (7)                                                           | 14 (9)                                                              | 23 (7)                                                         |
| St Marks Hospital, Harrow                                                  | Dr Arun Gupta           | 78                      | 8 (5)                                                     | 16 (10)                                                       | 24 (7)                                                           | 4 (8)                                     | 5 (4)                                                           | 15 (10)                                                             | 20 (6)                                                         |
| Radcliffe Hospital, Oxford                                                 | Dr Andrew Slater        | 39                      | 15 (9)                                                    | 11 (7)                                                        | 26 (8)                                                           | 7 (14)                                    | 9 (7)                                                           | 10 (7)                                                              | 19 (7)                                                         |
| St Georges Hospital, London                                                | Dr Richard Pollok       | 11                      | 6 (4)                                                     | 5 (3)                                                         | 11 (3)                                                           | 4 (8)                                     | 2 (2)                                                           | 5 (3)                                                               | 7 (3)                                                          |
| Royal Free Hospital, London                                                | Dr Peter Wylie          | 7                       | 1 (1)                                                     | 2 (1)                                                         | 3 (1)                                                            | 1 (2)                                     | 1 (1)                                                           | 1 (1)                                                               | 2 (1)                                                          |
| <b>TOTAL</b>                                                               |                         | <b>518</b>              | <b>168</b>                                                | <b>167</b>                                                    | <b>335</b>                                                       | <b>51</b>                                 | <b>133</b>                                                      | <b>151</b>                                                          | <b>284</b>                                                     |

**Table 2a. MRE sequence protocol**

| <b>Minimum</b>                                                                                                                                           | <b>Optional</b>                                                                              |
|----------------------------------------------------------------------------------------------------------------------------------------------------------|----------------------------------------------------------------------------------------------|
| Coronal steady state free precession gradient echo (SSFP GE) sequences without fat saturation                                                            | Axial steady state free precession gradient echo (SSFP GE) sequences without fat saturation  |
| Hyoscine butylbromide 20mg IV                                                                                                                            | Axial fast spin echo (FSE) T2W sequence with fat saturation                                  |
| Axial and coronal fast spin echo (FSE) T2W sequences without fat saturation                                                                              | Axial contrast-enhanced coronal T1W sequences with fat saturation (60-70 sec post injection) |
| Coronal coronal fast spin echo (FSE) T2W sequence with fat saturation                                                                                    | Coronal steady state free precession gradient echo (SSFP GE) dynamic Motility sequences      |
| Axial diffusion weighted images (b values 50 and 600)                                                                                                    |                                                                                              |
| Non-enhanced coronal T1W sequence with fat saturation followed by contrast-enhanced coronal T1W sequences with fat saturation (60-70 sec post injection) |                                                                                              |

**Table 2b. US sequence protocol**

| <b>Minimum</b>                          | <b>Optional</b>                                        |
|-----------------------------------------|--------------------------------------------------------|
| Curved (convex) probe (2-5Mhz)          | 2 cups of water 10 mins before to distend the duodenum |
| Linear probe >5Mhz                      |                                                        |
| Colour Doppler (typical setting 6-9m/s) |                                                        |

**Table 3. Suggested protocol imaging signs of active disease**

| <b>MRE</b>                                                                                                                                     | <b>US</b>                                                                                                                                                                                                      |
|------------------------------------------------------------------------------------------------------------------------------------------------|----------------------------------------------------------------------------------------------------------------------------------------------------------------------------------------------------------------|
| Wall thickening, increased mural T2 signal, increased mesenteric T2 signal, increased enhancement (mucosal or layered), ulceration or abscess, | Wall thickening, focal hyperechoic mesentery (with or without fat wrap), isolated thickened submucosal layer, poorly defined anti-mesenteric border, increased doppler vascular pattern, ulceration or abscess |

**Table 4. Investigations and results available to the consensus panels**

|                                                | New diagnosis [n (%)]<br>N=133 | Relapse [n (%)]<br>N=151 |
|------------------------------------------------|--------------------------------|--------------------------|
| MR enterography                                | 133 (100)                      | 151 (100)                |
| US                                             | 133 (100)                      | 151 (100) <sup>a</sup>   |
| Colonoscopy                                    | 123 (92)                       | 66 (44) <sup>b</sup>     |
| Gastroscopy                                    | 11 (8)                         | 6 (4)                    |
| Sigmoidoscopy                                  | 5 (4)                          | 12 (8)                   |
| Capsule endoscopy                              | 10 (8)                         | 8 (5)                    |
| CT enterography                                | 4 (3)                          | 9 (6)                    |
| CT abdo pelvis                                 | 21 (16)                        | 13 (9)                   |
| MR enteroclysis                                | 4 (3)                          | 6 (4)                    |
| MRI abdomen and/or pelvis                      | 5 (4)                          | 8 (5)                    |
| Barium FT                                      | 8 (6)                          | 19 (13)                  |
| Barium enteroclysis                            | 3 (2)                          | 7 (5)                    |
| Hydrosonography                                | 28 (21)                        | 36 (24)                  |
| White cell scan                                | 0 (0)                          | 0 (0)                    |
| CRP (baseline)                                 | 127 (95)                       | 145 (96)                 |
| HBI (baseline)                                 | 124 (93)                       | 142 (94)                 |
| Calprotectin (baseline)                        | 87 (65)                        | 89 (59)                  |
| CRP (10-20 weeks)                              | 108 (81)                       | 120 (79)                 |
| HBI (10-20 weeks)                              | 71 (53)                        | 77 (51)                  |
| Calprotectin (10-20 weeks)                     | 53 (40)                        | 65 (43)                  |
| Surgical resection specimen (post recruitment) | 1 (1)                          | 2 (1)                    |
| Other                                          | 8 (6)                          | 20 (13)                  |

<sup>a</sup> One patient with hydrosonography was used as main US scan

<sup>b</sup> Three patients with follow-up colonoscopy, no data available to consensus panel

**Table 5. Cross tabulation of MRE and US against the reference standard for small bowel disease extent. Both patient cohorts combined.**

**A. Patients with small bowel disease by the reference standard**

| Comparison of correct small bowel extent |   | USS |    | Total |
|------------------------------------------|---|-----|----|-------|
|                                          |   | +   | -  |       |
| MRE                                      | + | 125 | 46 | 171   |
|                                          | - | 27  | 35 | 62    |
| Total                                    |   | 152 | 81 | 233   |

Trial outcomes were calculated from bivariate multilevel patient specific (conditional) random effects models, not directly from 2x2 table

**B. Patients without small bowel disease by the reference standard**

| Comparison of correct small bowel extent |   | USS |    | Total |
|------------------------------------------|---|-----|----|-------|
|                                          |   | -   | +  |       |
| MRE                                      | - | 35  | 11 | 46    |
|                                          | + | 3   | 2  | 5     |
| Total                                    |   | 38  | 13 | 51    |

Trial outcomes were calculated from bivariate multilevel patient specific (conditional) random effects models, not directly from 2x2 table

**Supplementary Table 6. Per segment sensitivity and specificity for disease presence against the consensus reference standard.**

|                                     | Sensitivity % (CI 95%)                  |                  |                  |                      | Specificity % (CI 95%)          |                    |                   |                 |
|-------------------------------------|-----------------------------------------|------------------|------------------|----------------------|---------------------------------|--------------------|-------------------|-----------------|
|                                     | Number of disease positive <sup>a</sup> | MRE              | US               | Difference (P value) | Number of negative <sup>a</sup> | MRE                | US                | Difference      |
| <b>Small bowel segments</b>         |                                         |                  |                  |                      |                                 |                    |                   |                 |
| Duodenum <sup>b</sup>               | 8                                       | 25<br>(7 to 59)  | 25<br>(7 to 59)  | 0<br>(-13 to 13)     | 276                             | 100<br>(99 to 100) | 99<br>(97 to 100) | 1<br>(0 to 3)   |
| Jejunum                             | 13                                      | 71<br>(38 to 91) | 63<br>(32 to 86) | 8<br>(-29 to 46)     | 271                             | 99<br>(93 to 100)  | 99<br>(94 to 100) | 0<br>(-2 to 1)  |
| Ileum                               | 38                                      | 84<br>(67 to 93) | 56<br>(38 to 73) | 28<br>(8 to 49)      | 246                             | 93<br>(87 to 97)   | 93<br>(87 to 96)  | 0<br>(-4 to 4)  |
| Terminal ileum                      | 217                                     | 96<br>(91 to 99) | 92<br>(84 to 96) | 4<br>(0 to 8)        | 67                              | 97<br>(90 to 99)   | 93<br>(82 to 98)  | 4<br>(-2 to 10) |
| <b>Colonic segments<sup>c</sup></b> |                                         |                  |                  |                      |                                 |                    |                   |                 |
| Caecum                              | 78                                      | 46<br>(35 to 57) | 46<br>(35 to 57) | 0<br>(-12 to 12)     | 147                             | 96<br>(92 to 99)   | 90<br>(85 to 94)  | 6<br>(0 to 12)  |
| Ascending                           | 67                                      | 49<br>(38 to 61) | 49<br>(38 to 61) | 0<br>(-10 to 10)     | 200                             | 96<br>(93 to 98)   | 92<br>(88 to 95)  | 4<br>(0 to 8)   |
| Transverse                          | 61                                      | 46<br>(34 to 58) | 44<br>(32 to 57) | 2<br>(-12 to 15)     | 218                             | 97<br>(93 to 98)   | 95<br>(91 to 97)  | 2<br>(-1 to 5)  |
| Descending                          | 59                                      | 53<br>(40 to 65) | 41<br>(29 to 54) | 12<br>(-1 to 24)     | 221                             | 98<br>(95 to 99)   | 95<br>(91 to 97)  | 3<br>(0 to 6)   |
| Sigmoid                             | 76                                      | 46<br>(35 to 57) | 43<br>(33 to 55) | 3<br>(-11 to 16)     | 203                             | 96<br>(92 to 98)   | 93<br>(89 to 96)  | 3<br>(-1 to 7)  |
| Rectum                              | 54                                      | 44<br>(32 to 58) | 22<br>(13 to 35) | 22<br>(9 to 35)      | 228                             | 97<br>(94 to 99)   | 93<br>(89 to 96)  | 4<br>(0 to 7)   |

<sup>a</sup> Segments by consensus reference standard

<sup>b</sup> McNemar's test due to small number of patients with disease

<sup>c</sup> Analysis for individual colonic segments uses a population average approach to compare accuracy for individual colon segment



**Table 7. Per patient sensitivity and specificity for the presence of active disease against the consensus reference standard, according to patient cohort.**

|                                                     | New diagnosis<br>N=133 |                        |                  |                         |                        |                  |                         | Suspected relapse<br>N=151 |                        |                  |                         |                        |                  |                         |
|-----------------------------------------------------|------------------------|------------------------|------------------|-------------------------|------------------------|------------------|-------------------------|----------------------------|------------------------|------------------|-------------------------|------------------------|------------------|-------------------------|
|                                                     | DA,DI <sup>a</sup>     | Sensitivity % (CI 95%) |                  |                         | Specificity % (CI 95%) |                  |                         | DA,DI <sup>a</sup>         | Sensitivity % (CI 95%) |                  |                         | Specificity % (CI 95%) |                  |                         |
|                                                     |                        | MRE                    | US               | Difference<br>(P value) | MRE                    | US               | Difference<br>(P value) |                            | MRE                    | US               | Difference<br>(P value) | MRE                    | US               | Difference<br>(P value) |
| Active Small bowel disease <sup>b</sup>             | 104,29                 | 96<br>(90 to 99)       | 90<br>(79 to 96) | 6<br>(0 to 13)          | 90<br>(68 to 98)       | 83<br>(56 to 95) | 7<br>(-11 to 25)        | 105,46                     | 96<br>(90 to 99)       | 90<br>(79 to 96) | 6<br>(0 to 13)          | 79<br>(57 to 91)       | 73<br>(51 to 88) | 6<br>(-14 to 25)        |
| Active Colonic disease <sup>b</sup>                 | 76,57                  | 48<br>(30 to 66)       | 55<br>(36 to 72) | -7<br>(-28 to 14)       | 96<br>(88 to 99)       | 97<br>(90 to 99) | -1<br>(-5 to 4)         | 50,101                     | 83<br>(63 to 93)       | 81<br>(59 to 92) | 2<br>(-14 to 19)        | 96<br>(89 to 99)       | 98<br>(93 to 99) | -2<br>(-5 to 2)         |
| Active Small bowel and colonic disease <sup>c</sup> | 130,3                  | 64<br>(50 to 77)       | 59<br>(44 to 72) | 5<br>(-10 to 20)        | 0<br>(0 to 56)         | 0<br>(0 to 56)   | 0<br>(-33 to 33)        | 121,30                     | 88<br>(78 to 94)       | 73<br>(59 to 84) | 15<br>(3 to 26)         | 40<br>(25 to 58)       | 40<br>(25 to 58) | 0<br>(-22 to 22)        |

<sup>a</sup>Disease active (DA), disease inactive (DI) patients by consensus reference standard

<sup>b</sup>Agreement with reference standard for disease activity

<sup>c</sup>Agreement with reference standard for active disease presence (patients with disease in small bowel, colon or both). McNemar's test for specificity due to small number of new patients with inactive disease

**Table 8. Sensitivity and specificity for terminal ileal and colonic disease presence and against an ileo colonoscopy reference. Both patient cohorts combined.**

|                                     | Sensitivity % (CI 95%)                  |                  |                  |                      | Specificity % (CI 95%)                  |                  |                  |                      |
|-------------------------------------|-----------------------------------------|------------------|------------------|----------------------|-----------------------------------------|------------------|------------------|----------------------|
|                                     | Number of disease positive <sup>a</sup> | MRE              | US               | Difference (P value) | Number of disease negative <sup>a</sup> | MRE              | US               | Difference (P value) |
| Terminal ileum                      | 105                                     | 97<br>(91 to 99) | 91<br>(79 to 97) | 6<br>(-1 to 12)      | 81                                      | 41<br>(21 to 64) | 33<br>(15 to 57) | 8<br>(-14 to 30)     |
| Colonic disease extent <sup>b</sup> | 109                                     | 3<br>(1 to 11)   | 2<br>(0 to 8)    | 1<br>(-2 to 4)       | 77                                      | 94<br>(81 to 98) | 89<br>(73 to 96) | 5<br>(-3 to 14)      |
| Colonic disease presence            | 109                                     | 41<br>(26 to 58) | 49<br>(33 to 65) | -8<br>(-26 to 9)     | 77                                      | 95<br>(85 to 98) | 90<br>(76 to 96) | 5<br>(-3 to 13)      |
| Colonic segments <sup>c</sup>       |                                         |                  |                  |                      |                                         |                  |                  |                      |
| Caecum                              | 73                                      | 22<br>(14 to 33) | 25<br>(16 to 36) | -3<br>(-14 to 9)     | 101                                     | 72<br>(63 to 80) | 65<br>(56 to 74) | 7<br>(0 to 13)       |
| Ascending                           | 62                                      | 26<br>(16 to 38) | 23<br>(14 to 35) | 3<br>(-6 to 12)      | 121                                     | 88<br>(80 to 92) | 81<br>(73 to 87) | 7<br>(0 to 13)       |
| Transverse                          | 54                                      | 24<br>(15 to 37) | 24<br>(15 to 37) | 0<br>(-9 to 9)       | 132                                     | 92<br>(86 to 96) | 90<br>(84 to 94) | 2<br>(-2 to 6)       |
| Descending                          | 58                                      | 27<br>(18 to 40) | 24<br>(15 to 37) | 3<br>(-6 to 13)      | 128                                     | 95<br>(90 to 98) | 93<br>(87 to 96) | 2<br>(-1 to 6)       |
| Sigmoid                             | 74                                      | 24<br>(16 to 35) | 28<br>(19 to 40) | -4<br>(-17 to 9)     | 111                                     | 94<br>(87 to 97) | 94<br>(87 to 97) | 0<br>(-6 to 6)       |
| Rectum                              | 61                                      | 26<br>(17 to 39) | 13<br>(7 to 24)  | 13<br>(2 to 25)      | 125                                     | 97<br>(92 to 99) | 94<br>(88 to 97) | 3<br>(-2 to 8)       |

<sup>a</sup> Patients or colonic segments by ileo colonoscopy reference standard

<sup>b</sup> Agreement with reference standard for disease presence and segmental location

<sup>c</sup> Analysis for individual colonic segments uses a population average approach to compare imaging accuracy for individual colon segment

## **Metric Trial investigators**

Jade Dyer, Pranitha Veeramalla, Sue Tebbs, Steve Hibbert (Comprehensive Clinical Trials Unit at University College London (UCL), Institute of Clinical Trials and Methodology, London); Richard Ellis, Fergus Thursby-Pelham, Richard Beable, Nicola Gibbons, Claire Ward (Portsmouth Hospitals NHS Trust, Portsmouth); Anthony O'Connor, Hannah Lambie, Rachel Hyland, Nigel Scott, Roger Lapham, Doris Quartey, Deborah Scrimshaw (St James's University Hospital, Leeds Teaching Hospitals NHS Trust, Leeds); Helen Bungay, Maggie Betts, Simona Fourie (Oxford University Hospitals NHS Trust, Oxford); Niall Power (Royal Free London NHS Foundation Trust, London); Rajapandian Ilangovan, Uday Patel, Evgenia Mainta, Phillip Lung, Ian Johnston, Mani Naghibi, Morgan Moorghen, Adriana Martinez, Francois Porte (St Mark's Hospital, London North West University Healthcare NHS Trust, Harrow); Christopher Alexakis, James Pilcher, Anisur Rahman, Jonny Vlahos, Rebecca Greenhalgh, Anita Wale (St George's Hospital, London); Teresita Beeston, Wivijin Piga, Joey Clemente, Farooq Rahman, Simona de Caro, Shameer Mehta, Roser Vega, Roman Jastrub, Harbir Sidhu, Hameed Rafiee (University College Hospital, London); Mairead Tennent, Caron Innes, Craig Mowat, Gillian Duncan (Ninewells Hospital, Dundee); and Steve Morris (UCL, London).
